# Supplementary material for: Dual-layer spectral detector CT quantitative parameters and radiomics for predicting spread through air spaces of lung adenocarcinoma: A dual-center study
Source: Research Square preprint supplement (doi:10.21203/rs.3.rs-7391071/v1), 2025-09-17
Supplement: Supplementary file 1 [file a61ec5f1ff45a6fe479ba113.docx]

**Supplemental Appendix S1:** A total of 1834 radiomics features were extracted from each ROI, including shape features (n=14), first-order features (n=18), and texture features (n=73): gray level co-occurrence matrix features (GLCM) (n=22), gray level dependence matrix features (GLDM) (n=14), gray level run length matrix features (GLRLM) (n=16), gray level size zone matrix features (GLSZM) (n=16), neighbouring gray tone difference matrix features (NGTDM) (n=5), as well as first-order and texture features transformed by exponential (n=91), gradient (n=91), logarithm (n=91), square (n=91), squareroot (n=91), local binary pattern (LBP) (n=273), Laplacian of Gaussian (LoG) (n=273), and wavelet (n=728) filter transformations.

**Supplemental Table 1:** DLCT scanning protocol and contrast agent injection scheme

| **Parameter** | **Center 1** | **Center 2** |
| --- | --- | --- |
| CT scanner | Hawk Spectral CT (Philips  Healthcare, Netherlands) | IQon Spectral CT (Philips  Healthcare, Netherlands) |
| Tube voltage | 120 kVp | 120 kVp |
| Tube current | technique for automatic tube current modulation | technique for automatic tube current modulation |
| Helical pitch | 1.000 | 0.998 |
| Detector  collimation | 256×0.625 mm | 64×0.625 mm |
| Rotation speed | 0.5 s/r | 0.75 s/r |
| Matrix for image reconstruction | 512×512 | 512×512 |
| Scanning range | From the thoracic inlet to the base of the lung | From the thoracic inlet to the base of the lung |
| Spectral level | 3 | 1 |
| Filter | Standard B | Standard B |
| Reconstruction section thickness | 1 mm | 1 mm |
| Reconstruction interval | 1 mm | 1 mm |
| Contrast agent | Ioversol 320(Hengrui company) | Iohexol 300(GE Healthcare) |
| Injection dose | 1.1 ml/kg | 1.0 ml/kg |
| Flow rate | The injection duration is set to 25 seconds, and the flow rate is calculated by dividing the total drug volume by 25 seconds | 2.5 ml/s |
| Arterial Phase Scanning Mode | Automatic contrast agent tracking was employed with a threshold of 150 HU and the arterial phase scan was initiated with an 8-second delay | Automatic contrast agent tracking was employed with a threshold of 150 HU and the arterial phase scan was initiated with an 8-second delay |
| Venous phase  scanning mode | 35 seconds after the arterial phase scan ended | 35 seconds after the arterial phase scan ended |


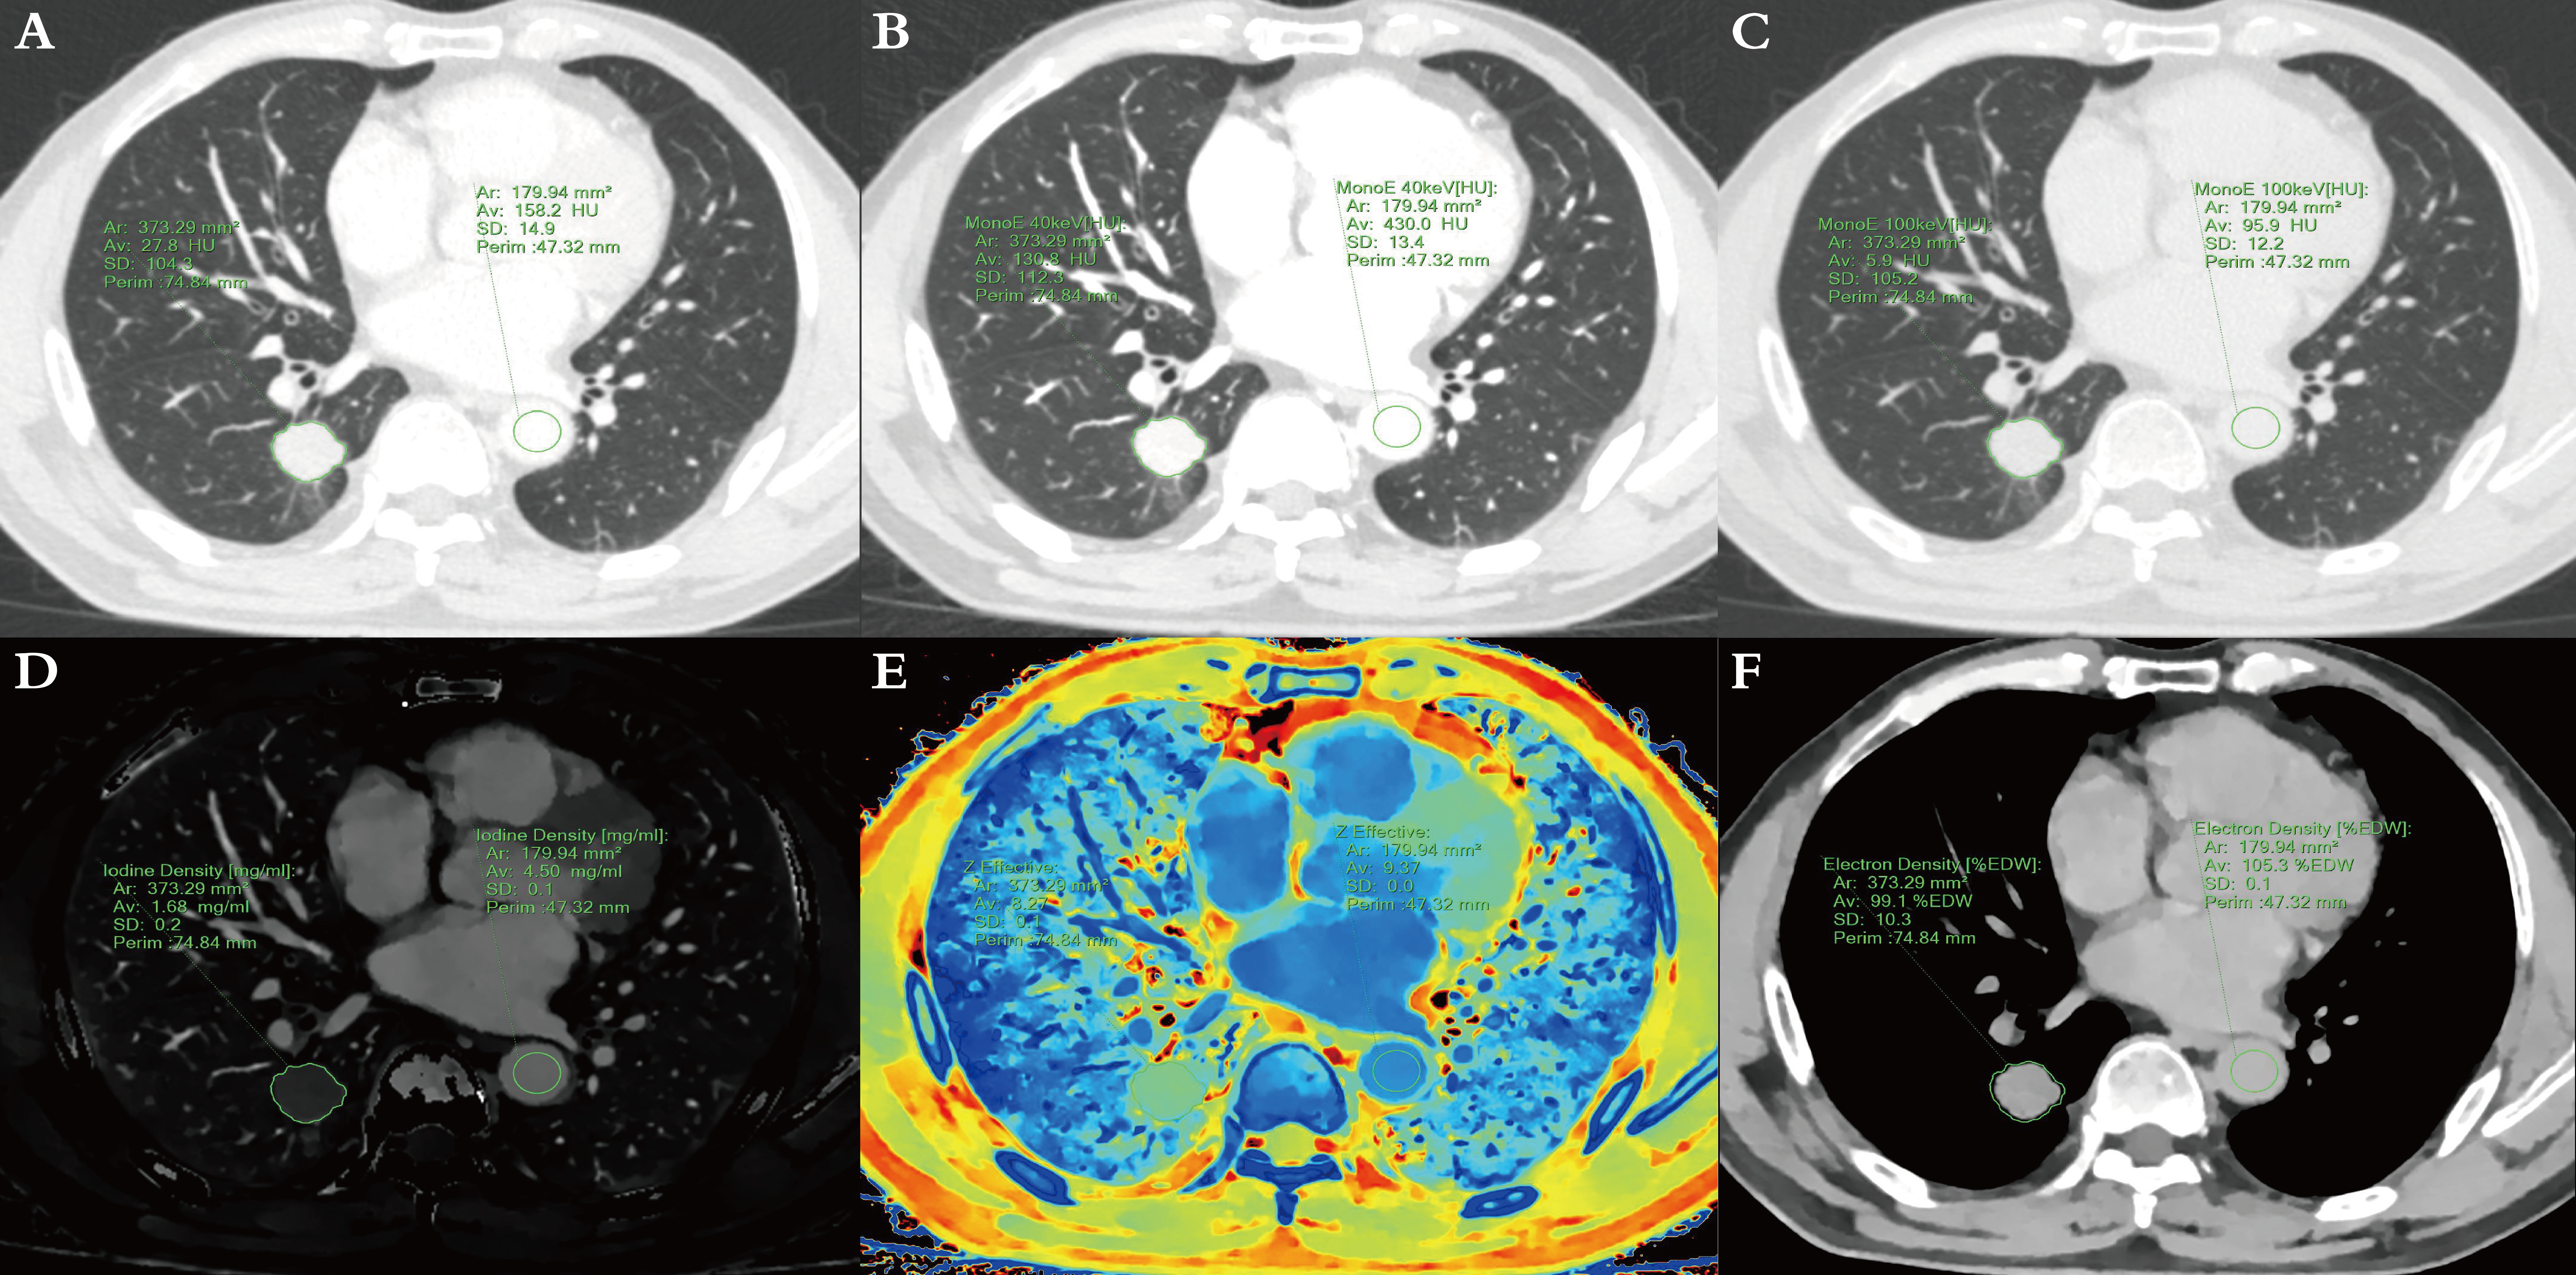


**Supplemental Figure 1:** Schematic diagram of DLCT quantitative parameter measurement. On the venous phase conventional 120 kVp lung window image (width, 1600 HU; level, -600 HU) (**A**), the ROI was delineated along the tumor contour. The "copy and paste" function was used to ensure consistency of the ROI across the virtual monoenergetic images (40 keV, **B**; 100 keV, **C**), iodine density (ID), effective atomic number (Zeff), and electron density (ED) maps (**D-F**). Additionally, an ROI was drawn on the aorta at the same level for NIC calculation.





**Supplemental Figure 2:** Radiomic features and corresponding weight coefficients selected from conventional (A), VMI 40keV (B), 65keV (C), 100keV (D), ID (E), Zeff (F), and ED (G) images.


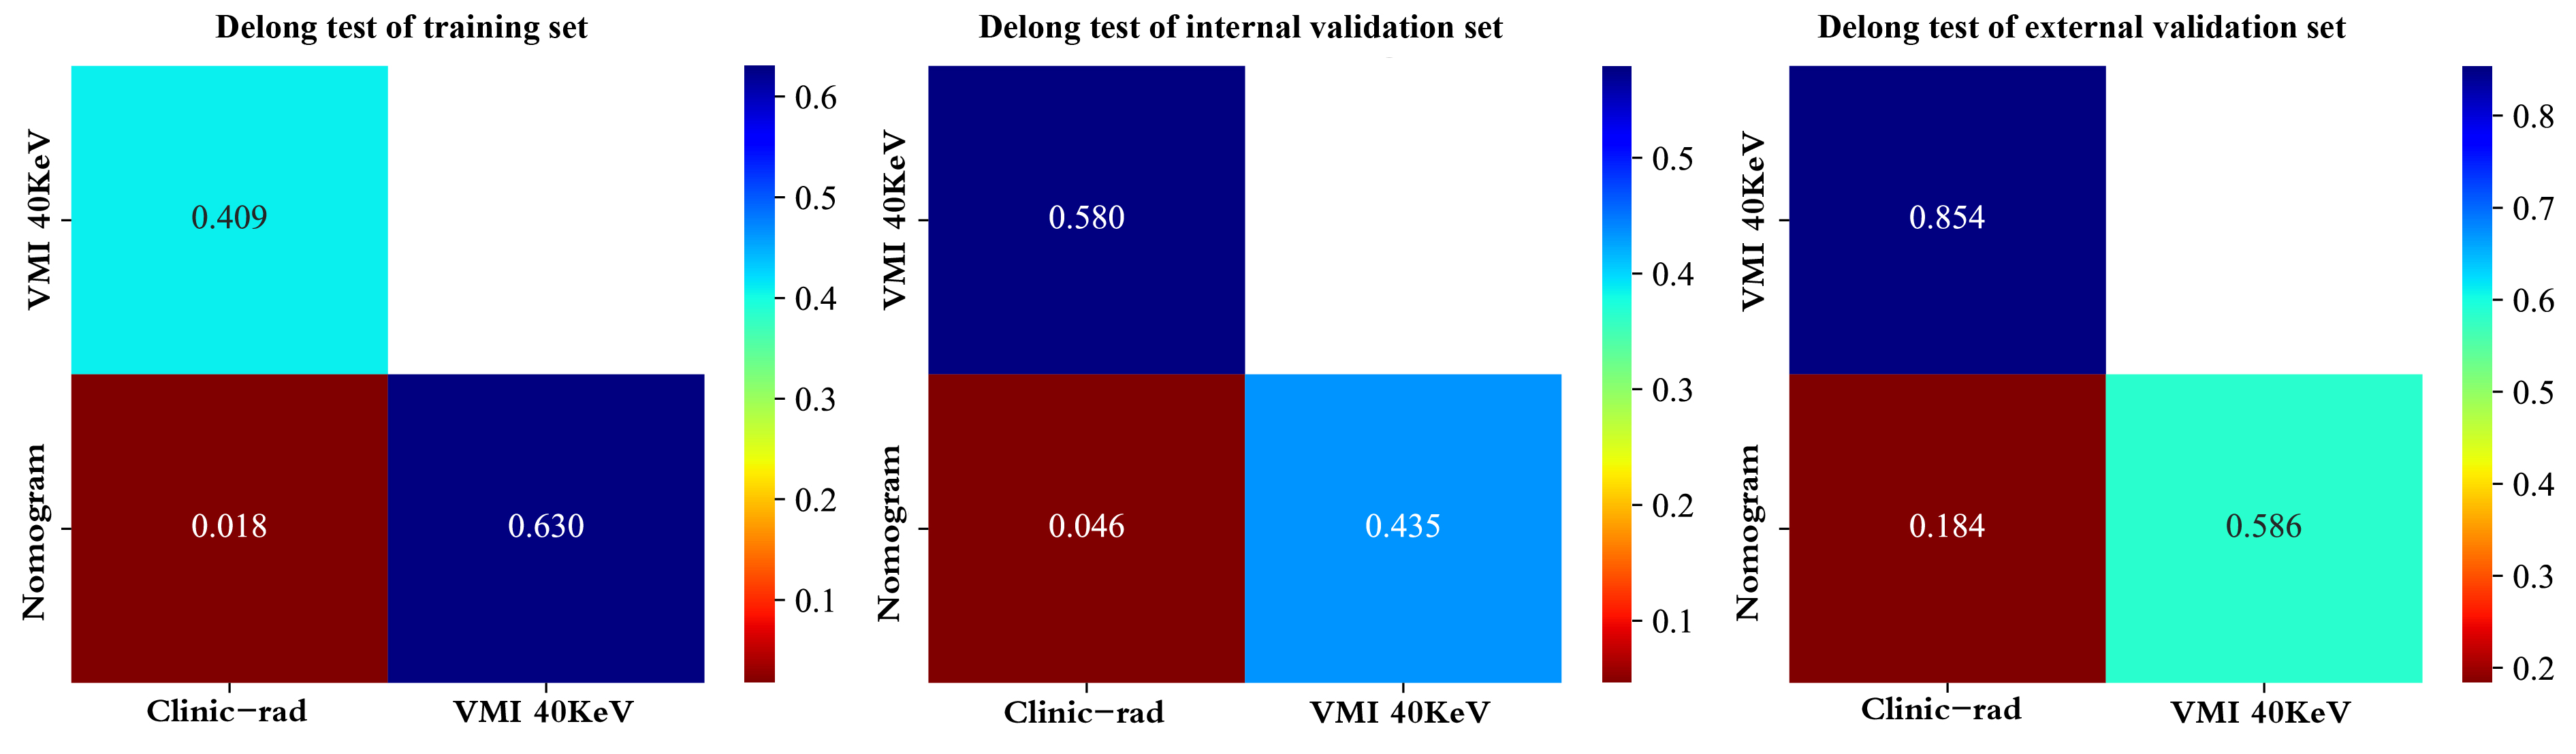


**Supplemental Figure 3:** The Delong test results of the clinical-radiological model, radiomics model, and nomogram in the training set, internal validation set, and external validation set.
